# Supplementary material for: Change in Denture Procedures after Implementation of National Health Insurance Coverage for the Elderly in Korea: A Nationwide Database
Source: MDPI journal article supplement (doi:10.3390/ijerph18052283), 2021-02-25
Supplement: s1 [file s1]

# Supplementary Materials

Table S1. General characteristics of study participants before and after coverage

|                           |                | 65-74 |                |       |                    |       | ≥75    |       |                |       |                    |       |        |
|---------------------------|----------------|-------|----------------|-------|--------------------|-------|--------|-------|----------------|-------|--------------------|-------|--------|
|                           |                | Total | Having denture |       | Not having denture |       | P      | Total | Having denture |       | Not having denture |       | P      |
|                           |                |       | N              | %     | N                  | %     |        |       | N              | %     | N                  | %     |        |
| Before coverage(2011)     |                |       |                |       |                    |       |        |       |                |       |                    |       |        |
| Total                     |                | 4,997 | 2,319          | 46.4% | 2,678              | 53.6% |        | 3,507 | 1,381          | 39.4% | 2,126              | 60.6% |        |
| Gender                    | Male           | 2,295 | 1,023          | 44.6% | 1,272              | 55.4% | 0.0474 | 1,320 | 499            | 37.8% | 821                | 62.2% | 0.7914 |
|                           | Female         | 2,702 | 1,296          | 48.0% | 1,406              | 52.0% |        | 2,187 | 882            | 40.3% | 1,305              | 59.7% |        |
| Living                    | City           | 1,067 | 529            | 49.6% | 538                | 50.4% | <.0001 | 567   | 257            | 45.3% | 310                | 54.7% | <.0001 |
|                           | Rural          | 3,930 | 1,790          | 45.5% | 2,140              | 54.5% |        | 2,940 | 1,124          | 38.2% | 1,816              | 61.8% |        |
| Economic activity         | Yes            | 2,177 | 1,033          | 47.5% | 1,144              | 52.5% | 0.0310 | 375   | 333            | 88.8% | 42                 | 11.2% | 0.0875 |
|                           | No             | 2,820 | 1,286          | 45.6% | 1,534              | 54.4% |        | 2,748 | 1,048          | 38.1% | 1,700              | 61.9% |        |
| Family Income             | Q1 (Low)       | 1,035 | 445            | 43.0% | 590                | 57.0% | 0.0238 | 1,131 | 424            | 37.5% | 707                | 62.5% | 0.2789 |
|                           | Q2             | 1,171 | 532            | 45.4% | 639                | 54.6% |        | 780   | 300            | 38.5% | 480                | 61.5% |        |
|                           | Q3             | 1,328 | 646            | 48.6% | 682                | 51.4% |        | 633   | 260            | 41.1% | 373                | 58.9% |        |
|                           | Q4 (High)      | 1,067 | 521            | 48.8% | 546                | 51.2% |        | 623   | 264            | 42.4% | 359                | 57.6% |        |
|                           | N/A            | 396   | 175            | 44.2% | 221                | 55.8% |        | 340   | 133            | 39.1% | 207                | 60.9% |        |
| Health Insurance coverage | Medical aid    | 408   | 158            | 38.7% | 250                | 61.3% | <.0001 | 417   | 135            | 32.4% | 282                | 67.6% | 0.0020 |
|                           | NHI            | 4,589 | 2,161          | 47.1% | 2,428              | 52.9% |        | 3,090 | 1,246          | 40.3% | 1,844              | 59.7% |        |
| Education                 | ≤Elementary    | 3,684 | 1,654          | 44.9% | 2,030              | 55.1% | <.0001 | 2,969 | 1,108          | 37.3% | 1,861              | 62.7% | <.0001 |
|                           | ≤Middle school | 609   | 308            | 50.6% | 301                | 49.4% |        | 205   | 96             | 46.8% | 109                | 53.2% |        |
|                           | ≤high school   | 568   | 284            | 50.0% | 284                | 50.0% |        | 237   | 123            | 51.9% | 114                | 48.1% |        |
|                           | ≥college       | 136   | 73             | 53.7% | 63                 | 46.3% |        | 96    | 54             | 56.3% | 42                 | 43.8% |        |
| Marital status            | Never married  | 29    | 10             | 34.5% | 19                 | 65.5% | 0.0001 | 21    | 8              | 38.1% | 13                 | 61.9% | <.0001 |
|                           | Married        | 3,435 | 1,623          | 47.2% | 1,812              | 52.8% |        | 1,590 | 655            | 41.2% | 935                | 58.8% |        |
|                           | Non-partnered  | 1,533 | 687            | 44.8% | 846                | 55.2% |        | 1,896 | 718            | 37.9% | 1,178              | 62.1% |        |
| Smoking                   | Yes            | 2,081 | 966            | 46.4% | 1,115              | 53.6% | 0.7559 | 1,269 | 467            | 36.8% | 802                | 63.2% | 0.3070 |
|                           | No             | 2,916 | 1,353          | 46.4% | 1,563              | 53.6% |        | 2,238 | 914            | 40.8% | 1,324              | 59.2% |        |
| Drinking                  | Yes            | 2,284 | 1,085          | 47.5% | 1,199              | 52.5% | 0.6459 | 1,093 | 470            | 43.0% | 623                | 57.0% | <.0001 |
|                           | No             | 2,713 | 1,234          | 45.5% | 1,479              | 54.5% |        | 2,414 | 911            | 37.7% | 1,503              | 62.3% |        |
| After coverage(2013)      |                |       |                |       |                    |       |        |       |                |       |                    |       |        |
| Total                     |                | 4,875 | 2,326          | 47.7% | 2,549              | 52.3% |        | 3,885 | 1,683          | 43.3% | 2,202              | 56.7% |        |
| Gender                    | M              | 2,201 | 1,009          | 45.8% | 1,192              | 54.2% | 0.6129 | 1,495 | 617            | 41.3% | 878                | 58.7% | 0.2244 |
|                           | F              | 2,674 | 1,317          | 49.3% | 1,357              | 50.7% |        | 2,390 | 1,066          | 44.6% | 1,324              | 55.4% |        |
| Living                    | City           | 1,113 | 591            | 53.1% | 522                | 46.9% | <.0001 | 689   | 328            | 47.6% | 361                | 52.4% | 0.0002 |

|                           |                |       |       |       |       |       |        |       |       |       |       |       |        |
|---------------------------|----------------|-------|-------|-------|-------|-------|--------|-------|-------|-------|-------|-------|--------|
| Economic activity         | Rural          | 3,762 | 1,735 | 46.1% | 2,027 | 53.9% | 0.2439 | 3,196 | 1,355 | 42.4% | 1,841 | 57.6% | 0.0087 |
|                           | Yes            | 2,165 | 1,061 | 49.0% | 1,104 | 51.0% |        | 897   | 424   | 47.3% | 473   | 52.7% |        |
|                           | No             | 2,710 | 1,265 | 46.7% | 1,445 | 53.3% |        | 2,988 | 1,259 | 42.1% | 1,729 | 57.9% |        |
| Family Income             | Q1 (Low)       | 924   | 381   | 41.2% | 543   | 58.8% | <.0001 | 1,220 | 521   | 42.7% | 699   | 57.3% | 0.8419 |
|                           | Q2             | 1,106 | 531   | 48.0% | 575   | 52.0% |        | 929   | 400   | 43.1% | 529   | 56.9% |        |
|                           | Q3             | 1,444 | 696   | 48.2% | 748   | 51.8% |        | 753   | 334   | 44.4% | 419   | 55.6% |        |
| Health Insurance coverage | Q4 (High)      | 1,223 | 621   | 50.8% | 602   | 49.2% | <.0001 | 831   | 367   | 44.2% | 464   | 55.8% | 0.0026 |
|                           | N/A            | 178   | 97    | 54.5% | 81    | 45.5% |        | 152   | 61    | 40.1% | 91    | 59.9% |        |
|                           | Medical aid    | 366   | 130   | 35.5% | 236   | 64.5% |        | 365   | 142   | 38.9% | 223   | 61.1% |        |
| Education                 | NHI            | 4,509 | 2,196 | 48.7% | 2,313 | 51.3% | 0.0018 | 3,520 | 1,541 | 43.8% | 1,979 | 56.2% | <.0001 |
|                           | ≤Elementary    | 3,407 | 1,584 | 46.5% | 1,823 | 53.5% |        | 3,231 | 1,358 | 42.0% | 1,873 | 58.0% |        |
|                           | ≤Middle school | 669   | 339   | 50.7% | 330   | 49.3% |        | 255   | 116   | 45.5% | 139   | 54.5% |        |
| Marital status            | ≤high school   | 607   | 297   | 48.9% | 310   | 51.1% | 0.1016 | 302   | 158   | 52.3% | 144   | 47.7% | 0.0376 |
|                           | ≥college       | 192   | 106   | 55.2% | 86    | 44.8% |        | 97    | 51    | 52.6% | 46    | 47.4% |        |
|                           | Never married  | 37    | 11    | 29.7% | 26    | 70.3% |        | 14    | 6     | 42.9% | 8     | 57.1% |        |
| Smoking                   | Married        | 3,264 | 1,573 | 48.2% | 1,691 | 51.8% | 0.9633 | 1,831 | 815   | 44.5% | 1,016 | 55.5% | 0.4436 |
|                           | Non-partnered  | 1,574 | 741   | 47.1% | 833   | 52.9% |        | 2,040 | 862   | 42.3% | 1,178 | 57.7% |        |
|                           | Yes            | 1,985 | 922   | 46.4% | 1,063 | 53.6% |        | 1,440 | 601   | 41.7% | 839   | 58.3% |        |
| Drinking                  | No             | 2,890 | 1,404 | 48.6% | 1,486 | 51.4% | <.0001 | 2,447 | 1,082 | 44.2% | 1,365 | 55.8% | 0.0002 |
|                           | Yes            | 2,193 | 1,104 | 50.3% | 1,089 | 49.7% |        | 1,226 | 556   | 45.4% | 670   | 54.6% |        |
|                           | No             | 2,682 | 1,222 | 45.6% | 1,460 | 54.4% |        | 2,661 | 1,127 | 42.4% | 1,534 | 57.6% |        |
